# Supplementary material for: Current Status of Clinical Application of Point-of-Care Testing
Source: Oxford University Press journal article supplement (doi:10.5858/arpa.2020-0112-ra), 2020-10-14
Supplement: 10.5858_arpa.2020-0112-ra.pdf [file 10.5858_arpa.2020-0112-ra.pdf]

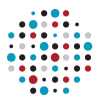

COLLEGE of AMERICAN  
PATHOLOGISTS

# ARCHIVES

of Pathology & Laboratory Medicine

## **EARLY ONLINE RELEASE**

Note: This article was posted on the *Archives* Web site as an Early Online Release. Early Online Release articles have been peer reviewed, copyedited, and reviewed by the authors. Additional changes or corrections may appear in these articles when they appear in a future print issue of the *Archives*. Early Online Release articles are citable by using the Digital Object Identifier (DOI), a unique number given to every article. The DOI will typically appear at the end of the abstract.

The DOI for this manuscript is doi: 10.5858/arpa.2020-0112-RA

The final published version of this manuscript will replace the Early Online Release version at the above DOI once it is available.

# Current Status of Clinical Application of Point-of-Care Testing

Hyung-Doo Park, MD, PhD

• **Context.**—The clinical applications of point-of-care testing (POCT) are gradually increasing in many health care systems. Recently, POCT devices using molecular genetic method techniques have been developed. We need to examine clinical pathways to see where POCT can be applied to improve them.

**Objective.**—To introduce up-to-date POCT items and equipment and to provide the content that should be prepared for clinical application of POCT.

**Data Sources.**—Literature review based on PubMed

Point-of-care testing (POCT) is defined as a laboratory test performed outside a central laboratory, usually at or near a clinical treatment site or by a patient. In most circumstances, medical staff perform POCT, but patients perform some POCT at home. Point-of-care testing is usually performed when quick decision-making is required, such as in an emergency room or when urgent treatment is to be determined. The advantages of POCT compared with central laboratory testing include shorter wait times for results and earlier discharge home.<sup>1</sup> The Table shows common POCTs and clinical situations. Current commercial point-of-care (POC) platforms can produce results faster than laboratory-based assays, but this improvement generally results in reduced accuracy.

Many analytes can be qualitatively detected or quantitatively measured using POCT; examples of commonly used POCTs are tests for glucose, blood gases, cardiac markers, urinalysis, creatinine, prothrombin time/international normalized ratio (INR), infectious diseases (human immunodeficiency virus [HIV], respiratory syncytial virus, influenza, etc), and drug screening. The considerable success of POCT is attributed to increasing clinical demand, heavy industry promotion, short turnaround time, economical and practical factors, and advancements in technology, such as lab-on-a-chip systems that use miniaturization, micromachining,

searches containing the terms *point-of-care testing, clinical chemistry, diagnostic hematology, and clinical microbiology*.

**Conclusions.**—If medical resources are limited, POCT can help clinicians make quick medical decisions. As POCT technology improves and menus expand, areas where POCT can be applied will also increase. We need to understand the limitations of POCTs so that they can be optimally used to improve patient management.

(*Arch Pathol Lab Med*. doi: 10.5858/arpa.2020-0112-RA)

microfluidics, nanotechnology, and wireless communication.<sup>2</sup>

This paper aims to describe the different applications of POCT and to review their limitations so that they can be used in the appropriate clinical pathways.

## DIAGNOSTIC HEMATOLOGY

In hematology, POCT is generally limited to hemoglobin and hematocrit testing by blood gas devices and point-of-care coagulation monitoring, such as prothrombin time and INR for patients on warfarin.

Some studies have investigated portable instruments using newer technology, such as single-sample cuvettes and image analysis, microfluidic cartridges, and the lab-on-a-chip/micro total analysis system platform, which provides complete blood cell count tests including 3-part differential white blood cells, red blood cells, platelet count, and hemoglobin for rapid diagnosis in resource-poor environments.<sup>3–5</sup> A rapid complete blood cell count and differential blood panel can help clinicians determine whether a patient is suffering from a viral or bacterial infection and whether he or she requires admission and antibiotics.

The use of POC INR testing has become popular for at-home testing and allows patients to easily use a device to monitor their INR and report their results to a clinician (either in person or via telephone), who can then adjust anticoagulant dose, if necessary.<sup>6</sup> The most common symptom of patients with venous thromboembolism is chest pain or dyspnea, but patients may also present with leg problems, arm pain, or chest tightness, or be asymptomatic.<sup>7</sup> In a systematic review and meta-analysis of 11 trials with data for 6417 participants and 12 800 person-years of follow-up, there was a significant reduction in thrombotic events in the self-monitoring INR group (hazard ratio, 0.51; 95% CI, 0.31–0.85) on oral anticoagulation.<sup>8</sup> Participants younger than 55 years showed a striking reduction in thrombotic events (hazard ratio, 0.33; 95% CI,

Accepted for publication August 3, 2020.

From the Department of Laboratory Medicine and Genetics, Samsung Medical Center, Sungkyunkwan University School of Medicine, Seoul, Republic of Korea.

The author has no relevant financial interest in the products or companies described in this article.

Corresponding author: Hyung-Doo Park, MD, PhD, Department of Laboratory Medicine and Genetics, Samsung Medical Center, Sungkyunkwan University School of Medicine, 81 Irwon-ro, Gangnam-gu, Seoul 06351, Republic of Korea (email: nayadoo@hanmail.net).

| Common Point-of-Care Tests                     |                                                                                       |
|------------------------------------------------|---------------------------------------------------------------------------------------|
| Test                                           | Clinical Setting                                                                      |
| Blood gases                                    | ICU settings, emergency rooms, operating rooms                                        |
| Cardiac markers                                | Emergency rooms                                                                       |
| Creatinine                                     | Radiology suites prior to contrast administration                                     |
| Diabetes (glucose, HbA <sub>1c</sub> )         | Home monitoring for patients with diabetes, inpatient monitoring for glycemic control |
| Drug screening                                 | Emergency rooms, outpatient treatment programs, workplace testing                     |
| hCG (pregnancy)                                | Emergency rooms, ICU settings                                                         |
| Infectious diseases (HIV, RSV, influenza, etc) | Outpatient and emergency settings for treatment decisions and cohorting or isolation  |
| PT/INR                                         | Coagulation clinics, cardiology practices, home monitoring                            |
| Urinalysis                                     | Physician offices                                                                     |

Abbreviations: HbA<sub>1c</sub>, hemoglobin A<sub>1c</sub>; hCG, human chorionic gonadotropin; HIV, human immunodeficiency virus; ICU, intensive care unit; INR, international normalized ratio; PT, prothrombin time; RSV, respiratory syncytial virus.

0.17–0.66), as did participants with mechanical heart valves (hazard ratio, 0.52; 95% CI, 0.35–0.77), so the authors<sup>8</sup> suggested that patients should be offered the option to self-manage their disease with suitable health care support.

In one investigation,<sup>9</sup> negative D-dimer test was valuable in ruling out acute pulmonary embolism in patients with a low pretest probability in hospital outpatient or accident and emergency settings. Combined with pretest probability scores, point-of-care D-dimer tests are a quick and safe way to rule out venous thromboembolism and improve patient experience.<sup>10</sup> In addition, the D-dimer POC device was comparable with the laboratory device and was sufficiently accurate for use as a screening tool in the emergency department (ED) setting.<sup>11</sup> In a prospective observational study<sup>12</sup> of 104 patients who underwent simultaneous D-dimer measurements using the 2 analyzers, the median time for D-dimer results from triage by VIDAS (bioMérieux SA) was 258 minutes (interquartile range, 173–360 minutes) and that by AQT90 FLEX POCT analyzer (Radiometer Medical ApS) was 146 minutes (interquartile range, 55–280.5 minutes). Following implementation of the rapid whole blood D-dimer test in the ED, there was a 13.8% decrease in patients admitted to the hospital, a 7.3% increase in patients discharged from the ED, and a 6.4% increase in patients admitted for observation only.<sup>13</sup> General practitioners can safely exclude pulmonary embolism by using the Wells criteria in combination with either a qualitative POC D-dimer or a quantitative D-dimer test.<sup>14</sup>

## CLINICAL CHEMISTRY

Glucose testing is the most commonly used POCT item in the field of clinical chemistry. The most common POC glucose test is glucose testing strips, which comprise 53.7% of the total global POCT market.<sup>15</sup> Blood glucose POCT was first used primarily at home or in nursing homes and was later expanded to inpatient settings, such as intensive care and postoperative inpatient environments, to help achieve strict glycemic control. Intensive glycemic control reduces long-term microvascular complications of diabetes. Previous representative reports include the Diabetes Control and Complication Trial<sup>16</sup> in subjects with type 1 diabetes and the United Kingdom Prospective Diabetes Study<sup>17</sup> in subjects with type 2 diabetes.

Van den Berghe et al<sup>18</sup> followed 1548 patients and reported that intensive blood glucose control to levels of 79–110 mg/dL using insulin decreased mortality from 8% to 4.6% in a small homogenous population of patients in the surgical intensive care unit (ICU). Although POCT glucose

measurements using whole blood may be ideal in the ICU, risks of POCT include increased variability of results; as such, routine use of capillary blood sampling to monitor glucose level is not recommended in critically ill patients.<sup>19,20</sup> The reliability of POCT glucose measurements depends upon a variety of factors, including underlying disease, patient drug regimens, interfering substances, and instrument analytical performance. Therefore, laboratory blood glucose analysis is recommended if a POCT glucose value is in the critical hypoglycemic or hyperglycemic range.<sup>21</sup> A newer-generation (StatStrip, Nova Biomedical) POC glucose meter met more stringent accuracy criteria because of reduced bias compared with the previous-generation device,<sup>22</sup> and implementation of StatStrip led to better agreement with venous plasma glucose, improved detection of critical low glucose results, and more efficient test utilization.<sup>23,24</sup>

New technologies, such as continuous glucose monitoring (CGM) systems, may help alleviate the risks associated with glucose fluctuations in the ICU.<sup>25–27</sup> Recently, the implantable CGM system (Eversense CGM System, Senseonics) was reported to provide accurate glucose readings through the intended 90-day sensor life with a favorable safety profile in participants with type 1 or type 2 diabetes.<sup>28,29</sup> However, one study<sup>30</sup> indicated that the use of intermittent retrospective CGM did not reduce the risk of macrosomia in 300 randomized pregnant women with type 1, type 2, or gestational diabetes to either CGM (n = 147) or standard treatment (n = 153). Women who were randomized to CGM had a lower hemoglobin A<sub>1c</sub> (HbA<sub>1c</sub>) concentration by the end of the pregnancy and smaller babies (reduced median customized birth weight centile and reduced rate of large-for-gestational-age [ $>90$ th percentile] infants) compared with women in the usual-care group.<sup>31</sup>

In addition to serum glucose tests, HbA<sub>1c</sub> measurements are useful for tracking patients with diabetes. Point-of-care testing for HbA<sub>1c</sub> is increasingly performed in outpatient conditions to monitor glucose control in diabetes mellitus. Laboratory HbA<sub>1c</sub> is established for both monitoring glycemic control and diagnosing diabetes.<sup>32,33</sup> The American Diabetes Association<sup>32</sup> recommends an HbA<sub>1c</sub> cutoff of 6.5% (48 mmol/mol) to diagnose diabetes, which is the threshold at which moderate retinopathy is detected. In a case-control study<sup>34</sup> of 607 pregnant women between the 24th and 28th weeks of gestation, screening for gestational diabetes mellitus by measuring HbA<sub>1c</sub> by G8 (Tosoh Corporation) reduced use of the glucose challenge test. Availability of rapid HbA<sub>1c</sub> measurements using the DCA 2000 instrument (Bayer) increased the frequency of therapy intensification and lowered HbA<sub>1c</sub> level in patients with type

2 diabetes in an urban neighborhood health center.<sup>35</sup> The Abbott (formerly Alere) Afinion AS100 HbA<sub>1c</sub> Dx device is the first and only POC HbA<sub>1c</sub> method cleared by the US Food and Drug Administration to aid health care professionals in the diagnosis of diabetes.

Several reports<sup>35–40</sup> have cited advantages and disadvantages of the POC HbA<sub>1c</sub> test in diabetes management, treatment adaptation, and glycemic control. In addition, many studies<sup>38,41–45</sup> have shown advantages of the POC HbA<sub>1c</sub> test in terms of patient satisfaction and cost-effectiveness. Several studies<sup>46–49</sup> of various POC HbA<sub>1c</sub> systems identified significant differences in analytical performance, including precision and accuracy. Some HbA<sub>1c</sub> POC devices had excellent analytical performance, whereas some were not acceptable; continuous performance improvements are needed.<sup>46–49</sup> Imprecision (coefficient of variation) ranged from 1.8% to 4.9% at an HbA<sub>1c</sub> value of 4.7% to 5.2% for 6 POC instruments (DCA Vantage, Siemens Diagnostics; In2it, Bio-Rad; Afinion, Axis-Shield; Nycocard, Axis-Shield; Clover, Infopia; and InnovaStar, DiaSys).<sup>48</sup> According to data of 6 years of accuracy-based proficiency testing for HbA<sub>1c</sub>, POCT for HbA<sub>1c</sub> measurement showed the highest “unacceptable” rate and imprecision.<sup>50</sup> This indicates that the limitations of POCT equipment on precision and accuracy need to be understood and improved. Intensive educational efforts combined with external quality assessment improve the preanalytical phase in general practitioner offices and nursing homes.<sup>51</sup>

Point-of-care testing for creatinine and cardiac markers in the ED is also rapidly changing. Molecularly imprinted polymers have been used as recognition elements in biomimetic sensors contain binding sites complementary in shape and functionality to their target analyte, and molecular imprinting was critically evaluated with respect to detection of cardiac biomarkers indicative of acute coronary syndrome.<sup>52</sup> The most obvious contribution of POCT to cardiovascular disease evaluation is diagnosis of acute coronary syndrome. Currently, diagnosis of acute myocardial infarction is dependent on the change of cardiac troponin (cTn) concentrations, with at least one measurement above the 99th-percentile upper reference limit and evidence of one other listed criterion specified by the European Society of Cardiologists.<sup>53</sup> Despite the importance of the analytical sensitivity of cTn measured by POC devices, there are significant differences in limit of detection among equipment using biosensors and biomimetic sensors for cardiac biomarkers.<sup>52</sup> Although high-sensitivity cTn assays measure relatively low values and document small increases above the 99th percentile upper reference limit, many contemporary and POC cTn assays may not detect small increases within the reference interval or at slightly above the 99th-percentile upper reference limit. This may lead to substantial differences in frequency of events based solely on the cTn assay used.<sup>53</sup> The decision to implement cTn POCT can significantly increase the capacity and efficiency for diagnosing acute myocardial infarction and other related conditions.<sup>54,55</sup>

The analytical sensitivity (limit of detection) of cTnI and cTnT in 12 POC assays varies 20-fold, ranging from 0.008 to 0.15 µg/L.<sup>56</sup> The 99th percentile of cTn values ranges from 0.01 to 0.2 µg/L.<sup>56</sup> In addition, the 99th percentile variability between assays is significant and shows lack of standardization of cTnI and cTnT assays.<sup>56</sup> When a single common population of patients with suspected acute coronary syndrome was used for analysis, the Alere Triage Cardio3

TnI assay (Alere) and the PathFast cTnI-II (Mitsubishi Chemical Medience Corporation) assay had similar diagnostic performance to the central laboratory assay Singulex Erenna TnI (Singulex).<sup>57</sup> The use of point-of-care cTnI measurement allows early rapid diagnosis or exclusion of myocardial infarction. The use of the additional measurement of myoglobin and CK-MB does not provide further diagnostic information.<sup>58</sup> Additional use of ultrasensitive copeptin improves the diagnostic performance of conventional sensitive POCT assays for cTn to overcome lower sensitivities at the cost of decreased clinical specificity.<sup>59</sup>

Point-of-care systems could be used to assess natriuretic peptide, B-type natriuretic peptide, or N-terminal pro-B-type natriuretic peptide levels in the ED and community outpatient settings to monitor the risk of acute heart failure; median time to discharge was reduced with versus without POCT (8.8 hours versus 14.2 hours,  $P < .001$ ).<sup>60</sup> Natriuretic peptides are an important objective tool in diagnosis, prognosis, and management of heart failure, and POCT is a valuable tool for obtaining real-time information, particularly in the emergency room.<sup>61</sup>

Other rapidly developing areas of POCT in the ED are creatinine measurement and pregnancy tests, both of which are used to determine whether patients can be properly referred for radiologic procedures.

Contrast-induced acute kidney injury occurs rarely in patients exposed to iodinated contrast. Screening patients at risk for postcontrast acute kidney injury may be feasible with creatinine POCT technology, as all at-risk patients were identified by several analyzers: i-STAT (Abbott), StatSensor (Nova Biomedical), epoc (Siemens), ABL90 Flex Plus (Radiometer Benelux), ABL800 FLEX (Radiometer Benelux), and STAT Profile Prime+ (Nova Biomedical).<sup>62,63</sup> In another study, i-STAT and epoc were the most well-functioning POC devices but were less user-friendly. StatSensor did not meet any of the error criteria for creatinine or estimated glomerular filtration rate measurements. However, it was more user-friendly than the other POC devices.<sup>64</sup>

Stomach pain, cramps, spasms, and obstetric complications are leading primary causes for women between 15 and 64 years of age to visit the ED.<sup>65</sup> Qualitative urine human chorionic gonadotropin (hCG) POCT is widely used in the ED to assess patient pregnancy status because presenting symptoms may be indicative of an abnormal pregnancy (abdominal pain, vaginal bleeding, pelvic discomfort, and miscarriage), or exclusion of pregnancy is required prior to performing diagnostic or therapeutic interventions that could harm a developing fetus.<sup>55</sup> The claimed lower limit of detection for urine hCG in many POC devices ranges from 6.3 to 50 mIU/mL, with most falling between 20 and 25 mIU/mL.<sup>66</sup> Some reports have shown that qualitative hCG POC devices can result in erroneous negative consequences due to excess hCG variants<sup>67–71</sup> and poor analytical sensitivity.<sup>72–74</sup> Kamer et al<sup>75</sup> reported that 4 commonly used hCG POC devices (Alere hCG Combo Cassette [Alere], ICON 20 hCG [Beckman Coulter, Inc.], OSOM hCG Combo Test [Sekisui Diagnostics, LLC], and Sure-Vue Serum/Urine hCG-STAT [Fisher Scientific]) were susceptible to false-negative results at low concentrations of urine hCG. An evaluation of sensitivity for the hook effect caused by hCG β core fragments showed that susceptibility to inhibition of 11 types of POCT equipment varied greatly; only 2 devices exhibited minimal to no susceptibility to hCG β core fragments.<sup>67</sup> Laboratory physicians and clinicians



should be aware of the limitations of using urine hCG POC devices to rule out early pregnancy.

Drug screening tests are frequently ordered in patients presenting to the ED with acute psychiatric symptoms such as agitation, ataxia, delirium, altered mental status, or psychosis. There are advantages and disadvantages regarding the usefulness of drug of abuse screening in an emergency room. Tenenbein<sup>76</sup> reported that emergency drug screening was unlikely to significantly impact patient management in the ED. Point-of-care testing for drugs of abuse and therapeutic drugs in the ED may be effective, less costly, and more rapid than the laboratory-based screening system.<sup>77–79</sup> However, immunoassays for drugs of abuse have poor specificity (inaccuracy), and there is no correlation between the presence of drugs or metabolites in the urine and toxic effects or clinical impairment.<sup>80</sup> Point-of-care testing is based on immunochromatography, in which a drug in the patient's sample competes with drug and antibody conjugates in the test to allow or block development of a colored line; most POCTs are visually interpreted in a few minutes.<sup>81</sup> An optimal screening test is not an optimal diagnostic test, and urine drug screens are primarily designed as a screening test.<sup>76</sup> Interpretation of negative screening results, whether expected or unexpected, can also be challenging. Several factors must be considered, including assay cutoff, cross-reactivity, time since last dose, low immunoreactivity, and individual metabolism.<sup>80</sup> The nature of the screening test allows false-positive results in some cases, but additional gold standard confirmatory testing, such as chromatography and mass spectrometry, can be carried out for confirmation.

Urine and serum (or plasma) are the most frequently used specimens for clinical toxicologic testing, but oral fluid may also be a rapid and accurate way to screen for psychoactive substances.<sup>82</sup> Overall estimates of reliability in oral fluid with POCT devices showed high variability for detecting amphetamines, benzodiazepines, cannabinoids, cocaine, and opioids.<sup>83</sup> When choosing a POCT device, certain features should be considered, such as forensic utility, reliability of device manufacturer, specimen type, test menu, analytical methodology and performance, result interpretation, and cost.<sup>83,84</sup>

Point-of-care testing blood gas analyzers for electrolytes and basic metabolic panels including  $\beta$ -hydroxybutyrate and lactate measurements facilitate management of several scenarios and may be useful in ED and ICU settings.<sup>55</sup> There is fair evidence that POCT of arterial blood gas results in the ICU and ED leads to improved clinical outcomes when POCT reduces therapeutic turnaround time compared with central laboratory testing.<sup>85</sup> Although arterial blood gas analysis remains the gold standard to assess acid-base, ventilation, and oxygenation status in critically ill patients, venous blood gas analysis has been shown to correlate with arterial blood gas analysis and has been proposed as a safer, less invasive alternative to arterial blood gas analysis for undifferentiated critically ill patients in the ED and ICU.<sup>86,87</sup> Calculated arterial blood gases from venous samples and pulse oximetry are comparable to arterial blood gas values. Point-of-care testing could reduce the logistic burden of arterial sampling, facilitate improved screening and follow-up, and reduce patient pain.<sup>88</sup> A retrospective study and prospective analytical observational studies at multiple health care sites showed sufficient agreement between sodium, potassium, and ionized calcium results obtained from blood gas and central laboratory analyzers to enable

prompt clinical decision-making.<sup>89–91</sup> With proper training and education of the ED care team, POCT can be used as an effective tool for managing patient flow in the ED.<sup>92</sup>

C-reactive protein (CRP) provides diagnostic value for ruling in or ruling out serious bacterial infection in febrile children.<sup>93</sup> Preantiretroviral therapy POC CRP testing may reduce mortality by identifying HIV patients at high risk for poor outcomes.<sup>94</sup> Brouwer and van Pelt<sup>95</sup> compared 2 semiquantitative strips (Actim CRP strips [Medix Biochemica] and Cleartest CRP strips [Servopax]) and 6 quantitative CRP tests (Afinion AS 100 analyzer [Axis Shield], QuikRead go [Orion Diagnostica], Smart analyzer [Eurolyser Diagnostica], iChroma analyzer [Boditech Med Inc.], Microsemi [Horiba Ltd.], and AQT90 FLEX [Radiometer Medical ApS]) to the Synchron CRP method (Synchron analyzer; Beckman Coulter), using the Clinical and Laboratory Standards Institute EP9 protocol. They concluded that the semiquantitative CRP strips could be used to discriminate between normal and increased levels of CRP, and that the Smart and Afinion would be the preferred quantitative analyzers for POCT, taking into account both analytical validation and practical evaluation.<sup>95</sup> Immunochromatographic methods were used in semiquantitative strips, and various methods such as immunoturbidimetric assay, solid-phase immunochemical assay, fluorescence sandwich immunoassay, and solid-phase sandwich immunoassay were used in quantitative CRP analyzers.<sup>95</sup> In addition, immediate POC CRP testing is reliable in forensic settings such as during autopsy and at postmortem inspection.<sup>96</sup>

## CLINICAL MICROBIOLOGY

Point-of-care testing immunodiagnostics in routine clinical laboratories commonly depend on antibodies as biorecognition elements in which the biomolecular interaction is monitored by sophisticated equipment provided by the assay manufacturer. Most widely applied recognition elements are monoclonal or polyclonal antibodies.<sup>97</sup> The World Health Organization has called for development of a rapid, biomarker-based, nonsputum test capable of detecting all forms of tuberculosis at the POC to enable immediate treatment initiation. Lipoarabinomannan is the only World Health Organization–endorsed tuberculosis biomarker that can be detected in urine, an easily collected sample.<sup>98</sup>

Lateral flow immunoassay is the most popular diagnostic tool that meets the required standards for colorimetric assays.<sup>99</sup> Lateral flow immunoassay provides sensitive and precise quantitative determination of target analytes because it carries out immunologic recognition at a variety of concentrations with frequently used labels, such as gold nanoparticles, quantum dots, and up-converting phosphorescent labels.<sup>100</sup> However, limitations should be considered according to the characteristics of the lateral flow immunoassay, such as visual interpretation and the possibility of misunderstanding, incorrect timing (read within a specific time), detection sensitivity, and manual input of results.

Quantitative reverse transcription polymerase chain reaction is the reference standard laboratory test for influenza diagnosis. New rapid diagnostic tests for influenza that show sensitivity and specificity comparable to those of real-time polymerase chain reaction assays are available (Figure).<sup>101–104</sup> Diagnosis of patients with influenza by POCT resulted in significantly higher rates of antiviral prescription in a systematic review of the impact of POCT for influenza on outcomes of patients with acute respiratory tract

Generalized steps in methods of diagnostic testing for influenza (adapted from Egilmezer et al<sup>101</sup> with permission). Abbreviations: POC, point of care; POCT, point-of-care test; RT-qPCR, quantitative reverse transcription polymerase chain reaction; TAT, turnaround time.

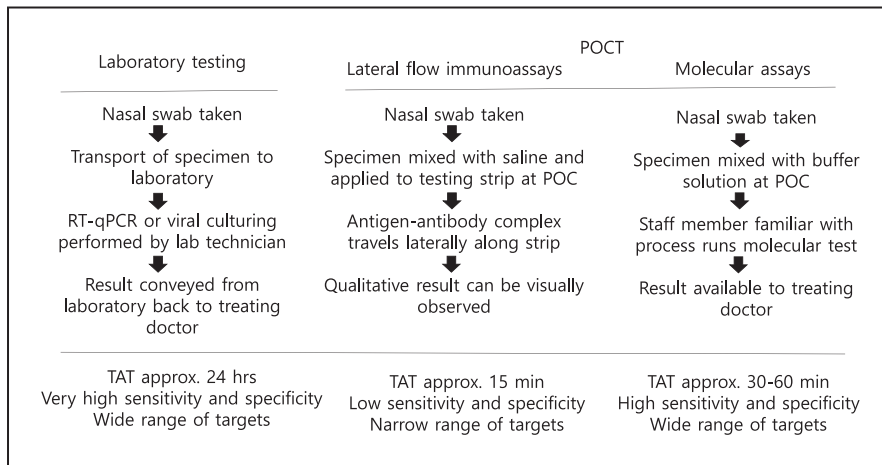

infection.<sup>101</sup> Although rapid molecular POCT for respiratory viruses (FilmArray Respiratory Panel, BioFire) in adults presenting to a hospital with acute respiratory illness was not associated with reduction in overall duration of antibiotics, more patients in the POCT group than in the control group received single doses or brief courses of antibiotics.<sup>105</sup> Importantly, a negative POCT test does not confirm the absence of influenza, and ED clinicians should use other confirmatory tests to avoid diagnostic delays or to confidently exclude influenza.<sup>106</sup>

Multiplex detectability is necessary for emergency treatment depending on disease stage or interactional infections. Brendish et al<sup>107</sup> reported several molecular platforms with potential for POCT use and evidence for clinical and economic benefits of testing for respiratory viruses in adults: Alere i Influenza A&B (Alere), FilmArray Respiratory Panel (BioFire Diagnostics), and Xpert Flu (Cepheid). Use of the FilmArray Respiratory Panel for detecting influenza A (H1 and H3), influenza B, respiratory syncytial virus, rhinovirus, enterovirus, human metapneumovirus, parainfluenza virus types 1 through 4, coronaviruses (OC43, 229E, HKU1, and NL63), and adenovirus was associated with reduced length of stay, improved influenza detection, and antiviral use, and appeared to be safe.<sup>105</sup> Hagen et al<sup>108</sup> suggested that introduction of a FilmArray meningitis/encephalitis panel into routine clinical procedures is associated with significantly reduced length and days of therapy for empiric anti-infective treatment in children with suspected meningoen- cephalitis (4.0 versus 3.0,  $P = .04$ , and 8.0 versus 6.0,  $P = .02$ , respectively). Patients with exacerbation of airway disease should undergo respiratory virus testing at the POC using a comprehensive syndromic multiplex panel rather than a molecular POCT for influenza alone, which would not detect the majority of viruses associated with early antibiotic discontinuation.<sup>109</sup>

An evaluation of 4 POC HIV tests (Chembio DPP HIV-1/2, Determine HIV-1/2 Ag/Ab Combo, INSTI HIV-1/HIV-2 Rapid Antibody Test, and OraQuick ADVANCE Rapid HIV-1/2 Antibody Test) using unprocessed oral fluid and whole blood specimens showed that sensitivity of whole blood POCTs ranged from 95.53% to 97.21%, and specificity was high for all tests (range, 99.44%–100.00%).<sup>110</sup> Despite relatively high specificity and sensitivity of POC HIV tests, the authors<sup>110</sup> suggested that organizations should have a plan to manage false results that occur because of the limitations of POCTs (eg, lower sensitivity to identify acute

HIV infection, effects of antiretroviral therapy and pre-exposure prophylaxis on oral fluid tests, low positive predictive value among pre-exposure prophylaxis populations). In a systematic review and meta-analysis,<sup>111</sup> rapid POC HIV testing was highly accurate compared with conventional tests and offered a clear advantage of timely interventions to reduce mother-to-child transmission of HIV. If POCT results for HIV are indeterminate, the test result should not be considered preliminarily positive or negative, and repeat POC HIV testing or HIV testing at an approved HIV testing laboratory is required.<sup>112</sup> Dual POCT screening for HIV and syphilis (SD BIOLINE HIV/Syphilis Duo Test, Standard Diagnostics; MedMira Multiplo Rapid TP/HIV Antibody Test, MedMira; and Chembio Dual Path Platform HIV/Syphilis Assay, Chembio Diagnostic System) was more cost-effective than single rapid tests and prevented more adverse pregnancy outcomes.<sup>113</sup> The FAC-SPresto POC CD4<sup>+</sup> T-cell test (Becton Dickinson) is useful and does not have significant variability in reliability when performed by nonlaboratory health care workers. Hence, it may be a valuable instrument to increase access and coverage of CD4 estimations for monitoring HIV-infected individuals in developing countries.<sup>114–116</sup> Expansion of molecular POC type *Mycobacterium tuberculosis* testing, including drug resistance testing, is also highly desired and necessary.<sup>2</sup>

The coronavirus disease 2019, which began in December 2019, is a severe acute respiratory syndrome coronavirus 2 infection, and real-time reverse transcription polymerase chain reaction is currently the most reliable diagnostic method for coronavirus disease 2019 around the world.<sup>117</sup> Serologic testing may be helpful for diagnosis of suspected patients with negative reverse transcription polymerase chain reaction results and for identification of individuals with an adaptive immune response to severe acute respiratory syndrome coronavirus 2, indicating recent or prior infection.<sup>118</sup> But the POC immunochromatographic immunoglobulin (Ig) M/IgG antibody assay had low sensitivity during the early phase of severe acute respiratory syndrome coronavirus 2, and immunochromatographic assay alone is not recommended for initial diagnostic testing for coronavirus disease 2019.<sup>119</sup>

## CONCLUSIONS

Point-of-care testing is likely to play an increasing role in health care delivery in the future. It will improve access to

health care and increase the efficacy of service provided to patients.<sup>49</sup> Although POCT provides laboratory results faster than the traditional central laboratory, process improvement is needed to optimize the accuracy of laboratory results.<sup>92</sup>

Molecular POCT for common pathogens in select populations, such as in intensive care or other common illness presentations, needs to be evaluated to further improve patient care and effectively manage health care resources.<sup>120</sup> Despite several advantages of POCT, limitations include cost, imprecision and inaccuracy, requirement for an interdisciplinary approach, and human error. Although the use of POCT is expanding in many areas, the limitations must be understood and improvements in analytical performance achieved to properly interpret POCT results.

## References

1. Kankaanpää M, Raitakari M, Muukkonen L, et al. Use of point-of-care testing and early assessment model reduces length of stay for ambulatory patients in an emergency department. *Scand J Trauma Resusc Emerg Med.* 2016;24(1):125.
2. Abel G. Current status and future prospects of point-of-care testing around the globe. *Expert Rev Mol Diagn.* 2015;15(7):853–855.
3. Abbasi U, Chowdhury P, Subramaniam S, et al. A cartridge based point-of-care device for complete blood count. *Sci Rep.* 2019;9(1):18583.
4. Smith S, Madzivhandila P, Sewart R, et al. Microfluidic cartridges for automated, point-of-care blood cell counting. *SLAS Technol.* 2017;22(2):176–185.
5. Larsson A, Carlsson L, Karlsson B, Lipcsey M. Rapid testing of red blood cell parameters in primary care patients using HemoScreen point of care instrument. *BMC Fam Pract.* 2019;20(1):77.
6. Lingervelder D, Koffijberg H, Kusters R, Iljerman MJ. Point-of-care testing in primary care: a systematic review on implementation aspects addressed in test evaluations. *Int J Clin Pract.* 2019;73(10):e13392.
7. Konstantinides SV, Torbicki A, Agnelli G, et al. 2014 ESC guidelines on the diagnosis and management of acute pulmonary embolism. *Eur Heart J.* 2014;35(43):3033–3069, 3069a–3069k.
8. Heneghan C, Ward A, Perera R, et al. Self-monitoring of oral anticoagulation: systematic review and meta-analysis of individual patient data. *Lancet.* 2012;379(9813):322–334.
9. Crawford F, Andras A, Welch K, Sheares K, Keeling D, Chappell FM. D-dimer test for excluding the diagnosis of pulmonary embolism. *Cochrane Database Syst Rev.* 2016(8):CD010864.
10. Marquardt U, Apau D. Point-of-care D-dimer testing in emergency departments. *Emerg Nurse.* 2015;23(5):29–35.
11. Sen B, Kesteven P, Avery P. Comparison of D-dimer point of care test (POCT) against current laboratory test in patients with suspected venous thromboembolism (VTE) presenting to the emergency department (ED). *J Clin Pathol.* 2014;67(5):437–440.
12. Perveen S, Unwin D, Shetty AL. Point of care D-dimer testing in the emergency department: a bioequivalence study. *Ann Lab Med.* 2013;33(1):34–38.
13. Lee-Lewandrowski E, Nichols J, Van Cott E, et al. Implementation of a rapid whole blood D-dimer test in the emergency department of an urban academic medical center: impact on ED length of stay and ancillary test utilization. *Am J Clin Pathol.* 2009;132(3):326–331.
14. Lucassen WA, Erkens PM, Geersing GJ, et al. Qualitative point-of-care D-dimer testing compared with quantitative D-dimer testing in excluding pulmonary embolism in primary care. *J Thromb Haemost.* 2015;13(6):1004–1009.
15. Reynolds TM, Pillay TS. Donald Rumsfeld and point-of-care testing (POCT): the problem of unknown unknowns—venous blood and glucose oxidase-based test strips. *J Clin Pathol.* 2016;69(10):839–840.
16. Nathan DM, Genuth S, Lachin J, et al. The effect of intensive treatment of diabetes on the development and progression of long-term complications in insulin-dependent diabetes mellitus. *N Engl J Med.* 1993;329(14):977–986.
17. Intensive blood-glucose control with sulphonylureas or insulin compared with conventional treatment and risk of complications in patients with type 2 diabetes (UKPDS 33). UK Prospective Diabetes Study (UKPDS) Group. *Lancet.* 1998;352(9131):837–853.
18. Van den Berghe G, Wouters P, Weekers F, et al. Intensive insulin therapy in critically ill patients. *N Engl J Med.* 2001;345(19):1359–1367.
19. Petersen JR, Graves DF, Tacker DH, Okorodudu AO, Mohammad AA, Cardenas VJ Jr. Comparison of POCT and central laboratory blood glucose results using arterial, capillary, and venous samples from MICU patients on a tight glycemic protocol. *Clin Chim Acta.* 2008;396(1–2):10–13.
20. Shearer A, Boehmer M, Closs M, et al. Comparison of glucose point-of-care values with laboratory values in critically ill patients. *Am J Crit Care.* 2009;18(3):224–230.

21. Janssen K, Delanghe J. Importance of the pre-analytical phase in blood glucose analysis. *Acta Clin Belg.* 2010;65(5):311–318.
22. Karon BS, Blanshan CT, Deobald GR, Wockenfus AM. Retrospective evaluation of the accuracy of Roche AccuChek Inform and Nova StatStrip glucose meters when used on critically ill patients. *Diabetes Technol Ther.* 2014;16(12):828–832.
23. Raizman JE, Shea J, Daly CH, et al. Clinical impact of improved point-of-care glucose monitoring in neonatal intensive care using Nova StatStrip: evidence for improved accuracy, better sensitivity, and reduced test utilization. *Clin Biochem.* 2016;49(12):879–884.
24. Lockyer MG, Fu K, Edwards RM, et al. Evaluation of the Nova StatStrip glucometer in a pediatric hospital setting. *Clin Biochem.* 2014;47(9):840–843.
25. Honiden S, Inzucchi SE. Metabolic management during critical illness: glycemic control in the ICU. *Semin Respir Crit Care Med.* 2015;36(6):859–869.
26. Brady V. Management of hyperglycemia in the intensive care unit: when glucose reaches critical levels. *Crit Care Nurs Clin North Am.* 2013;25(1):7–13.
27. Strasma PJ, Finfer S, Flower O, et al. Use of an intravascular fluorescent continuous glucose sensor in ICU patients. *J Diabetes Sci Technol.* 2015;9(4):762–770.
28. Christiansen MP, Klaff LJ, Brazz R, et al. A prospective multicenter evaluation of the accuracy of a novel implanted continuous glucose sensor: PRECISE II. *Diabetes Technol Ther.* 2018;20(3):197–206.
29. Christiansen MP, Klaff LJ, Bailey TS, Brazz R, Carlson G, Tweden KS. A prospective multicenter evaluation of the accuracy and safety of an implanted continuous glucose sensor: the PRECISION study. *Diabetes Technol Ther.* 2019;21(5):231–237.
30. Voormolen DN, DeVries JH, Sanson RME, et al. Continuous glucose monitoring during diabetic pregnancy (GlucoMOMS): a multicentre randomized controlled trial. *Diabetes Obes Metab.* 2018;20(8):1894–1902.
31. Feig DS, Murphy HR. Continuous glucose monitoring in pregnant women with type 1 diabetes: benefits for mothers, using pumps or pens, and their babies. *Diabet Med.* 2018;35(4):430–435.
32. Diagnosis and classification of diabetes mellitus. *Diabetes Care.* 2010;33(suppl 1):S62–S69.
33. Florkowski C, Crooke M. Standardisation of reporting haemoglobin A1c: adoption of the New Zealand Society for the Study of Diabetes (NZSSD) position statement. *N Z Med J.* 2010;123(1310):43–49.
34. Maesa JM, Fernandez-Riejos P, Gonzalez-Rodriguez C, Sanchez-Margalet V. Screening for gestational diabetes mellitus by measuring glycated hemoglobin can reduce the use of the glucose challenge test. *Ann Lab Med.* 2019;39(6):524–529.
35. Miller CD, Barnes CS, Phillips LS, et al. Rapid A1c availability improves clinical decision-making in an urban primary care clinic. *Diabetes Care.* 2003;26(4):1158–1163.
36. Schnell O, Crocker JB, Weng J. Impact of HbA1c testing at point of care on diabetes management. *J Diabetes Sci Technol.* 2017;11(3):611–617.
37. Al-Ansary L, Farmer A, Hirst J, et al. Point-of-care testing for HbA<sub>1c</sub> in the management of diabetes: a systematic review and metaanalysis. *Clin Chem.* 2011;57(4):568–576.
38. Thaler LM, Ziemer DC, Gallina DL, et al. Diabetes in urban African-Americans, XVII: availability of rapid HbA1c measurements enhances clinical decision-making. *Diabetes Care.* 1999;22(9):1415–1421.
39. Egbinike V, Gerard S. The impact of point-of-care A1C testing on provider compliance and A1C levels in a primary setting. *Diabetes Educ.* 2013;39(1):66–73.
40. Rust G, Gailor M, Daniels E, McMillan-Persaud B, Strothers H, Mayberry R. Point of care testing to improve glycemic control. *Int J Health Care Qual Assur.* 2008;21(3):325–335.
41. Laurence CO, Gialamas A, Bubner T, et al. Patient satisfaction with point-of-care testing in general practice. *Br J Gen Pract.* 2010;60(572):e98–e104.
42. Crocker JB, Lee-Lewandrowski E, Lewandrowski N, Baron J, Gregory K, Lewandrowski K. Implementation of point-of-care testing in an ambulatory practice of an academic medical center. *Am J Clin Pathol.* 2014;142(5):640–646.
43. Lee-Lewandrowski E, Lewandrowski K. Perspectives on cost and outcomes for point-of-care testing. *Clin Lab Med.* 2009;29(3):479–489.
44. Laurence CO, Moss JR, Briggs NE, Beilby JJ. The cost-effectiveness of point of care testing in a general practice setting: results from a randomised controlled trial. *BMC Health Serv Res.* 2010;10:165.
45. Chadee A, Blackhouse G, Goeree R. Point-of-care hemoglobin A<sub>1c</sub> testing: a budget impact analysis. *Ont Health Technol Assess Ser.* 2014;14(9):1–23.
46. Lenters-Westra E, Slingerland RJ. Three of 7 hemoglobin A<sub>1c</sub> point-of-care instruments do not meet generally accepted analytical performance criteria. *Clin Chem.* 2014;60(8):1062–1072.
47. Criel M, Jonckheere S, Langlois M. Evaluation of three hemoglobin A<sub>1c</sub> point-of-care instruments. *Clin Lab.* 2016;62(3):285–291.
48. Lenters-Westra E, Slingerland RJ. Six of eight hemoglobin A<sub>1c</sub> point-of-care instruments do not meet the general accepted analytical performance criteria. *Clin Chem.* 2010;56(1):44–52.
49. Lenters-Westra E, English E. Evaluation of four HbA<sub>1c</sub> point-of-care devices using international quality targets: are they fit for the purpose? *J Diabetes Sci Technol.* 2018;12(4):762–770.
50. Chung S, Jun SH, Song WH, Song J. Six years' experience of accuracy-based proficiency testing for HbA<sub>1c</sub> in Korea. *Journal of Laboratory Medicine and Quality Assurance.* 2015;37(2):92–100.



51. Solvik UO, Bjelkaroy WI, Berg KVD, Saga AL, Hager HB, Sandberg S. Intensive educational efforts combined with external quality assessment improve the preanalytical phase in general practitioner offices and nursing homes. *Clin Chem Lab Med*. 2017;55(12):1857–1864.
52. Regan B, Boyle F, O’Kennedy R, Collins D. Evaluation of molecularly imprinted polymers for point-of-care testing for cardiovascular disease. *Sensors (Basel)*. 2019;19(16).
53. Thygesen K, Alpert JS, Jaffe AS, et al. Fourth universal definition of myocardial infarction (2018). *Circulation*. 2018;138(20):e618–e651.
54. Bingisser R, Cairns C, Christ M, et al. Cardiac troponin: a critical review of the case for point-of-care testing in the ED. *Am J Emerg Med*. 2012;30(8):1639–1649.
55. Florkowski C, Don-Wauchope A, Gimenez N, Rodriguez-Capote K, Wils J, Zemlin A. Point-of-care testing (POCT) and evidence-based laboratory medicine (EBLM)—does it leverage any advantage in clinical decision making? *Crit Rev Clin Lab Sci*. 2017;54(7–8):471–494.
56. Apple FS, Sandoval Y, Jaffe AS, Ordonez-Llanos J. Cardiac troponin assays: guide to understanding analytical characteristics and their impact on clinical care. *Clin Chem*. 2017;63(1):73–81.
57. Peacock WF, Diercks D, Birkhahn R, et al. Can a point-of-care Troponin I Assay be as good as a central laboratory assay?: a MIDAS investigation. *Ann Lab Med*. 2016;36(5):405–412.
58. Collinson P, Goodacre S, Gaze D, Gray A. Very early diagnosis of chest pain by point-of-care testing: comparison of the diagnostic efficiency of a panel of cardiac biomarkers compared with troponin measurement alone in the RATPAC trial. *Heart*. 2012;98(4):312–318.
59. Vafaei M, Biener M, Mueller M, et al. Addition of copeptin improves diagnostic performance of point-of-care testing (POCT) for cardiac troponin T in early rule-out of myocardial infarction—a pilot study. *Int J Cardiol*. 2015;198:26–30.
60. Bingisser R, Cairns CB, Christ M, et al. Measurement of natriuretic peptides at the point of care in the emergency and ambulatory setting: current status and future perspectives. *Am Heart J*. 2013;166(4):614–621.e611.
61. Iwaz JA, Maisel AS. Recent advances in point-of-care testing for natriuretic peptides: potential impact on heart failure diagnosis and management. *Expert Rev Mol Diagn*. 2016;16(6):641–650.
62. Bogaert L, Schiemskey T, Van Hover P, De Schrijver P, Van Hoovels L. Analytical and diagnostic performance evaluation of five creatinine POCT devices in the identification of patients at risk for post-contrast acute kidney injury (PCKAI). *Clin Chem Lab Med*. 2019;57(9):e214–e217.
63. Snaith B, Harris MA, Shinkins B, Jordaan M, Messenger M, Lewington A. Point-of-care creatinine testing for kidney function measurement prior to contrast-enhanced diagnostic imaging: evaluation of the performance of three systems for clinical utility. *Clin Chem Lab Med*. 2018;56(8):1269–1276.
64. van der Heijden C, Roosens L, Cluckers H, Van Craenenbroeck AH, Peeters B. Analytical and clinical performance of three hand-held point-of-care creatinine analyzers for renal function measurements prior to contrast-enhanced imaging. *Clin Chim Acta*. 2019;497:13–19.
65. Niska R, Bhuiya F, Xu J. National Hospital Ambulatory Medical Care Survey: 2007 emergency department summary. *Natl Health Stat Report*. 2010; (26):1–31.
66. Braunstein GD. The long gestation of the modern home pregnancy test. *Clin Chem*. 2014;60(1):18–21.
67. Nerenz RD, Song H, Gronowski AM. Screening method to evaluate point-of-care human chorionic gonadotropin (hCG) devices for susceptibility to the hook effect by hCG beta core fragment: evaluation of 11 devices. *Clin Chem*. 2014;60(4):667–674.
68. Nerenz RD, Gronowski AM. Point-of-care and over-the-counter qualitative human chorionic gonadotropin (hCG) devices remain susceptible to false-negative results caused by excess hCG beta core fragment. *Clin Chem*. 2013; 59(11):1672–1674.
69. Gronowski AM, Powers M, Stenman UH, Ashby L, Scott MG. False-negative results from point-of-care qualitative human chorionic gonadotropin (hCG) devices caused by excess hCGbeta core fragment vary with device lot number. *Clin Chem*. 2009;55(10):1885–1886.
70. Gronowski AM, Cervinski M, Stenman UH, Woodworth A, Ashby L, Scott MG. False-negative results in point-of-care qualitative human chorionic gonadotropin (hCG) devices due to excess hCGbeta core fragment. *Clin Chem*. 2009;55(7):1389–1394.
71. Griffey RT, Trent CJ, Bavolek RA, Keeperman JB, Sampson C, Poirier RF. “Hook-like effect” causes false-negative point-of-care urine pregnancy testing in emergency patients. *J Emerg Med*. 2013;44(1):155–160.
72. Nickmans S, Vermeersch P, Van Eldere J, Billen J. Performance of qualitative urinary hCG assays. *Acta Clin Belg*. 2014;69(4):277–279.
73. Greene DN, Schmidt RL, Kamer SM, Grenache DG, Hoke C, Lorey TS. Limitations in qualitative point of care hCG tests for detecting early pregnancy. *Clin Chim Acta*. 2013;415:317–321.
74. Terwijn M, van Schie A, Blankenstein MA, Heijboer AC. Pregnancy detection by quantitative urine hCG analysis: the need for a lower cut-off. *Clin Chim Acta*. 2013;424:174.
75. Kamer SM, Foley KF, Schmidt RL, Greene DN. Analytical sensitivity of four commonly used hCG point of care devices. *Clin Biochem*. 2015;48(6):448–452.
76. Tenenbein M. Do you really need that emergency drug screen? *Clin Toxicol (Phila)*. 2009;47(4):286–291.
77. Mastrovitch TA, Bithoney WG, DeBari VA, Nina AG. Point-of-care testing for drugs of abuse in an urban emergency department. *Ann Clin Lab Sci*. 2002; 32(4):383–386.
78. Attema-de Jonge ME, Peeters SY, Franssen EJ. Performance of three point-of-care urinalysis test devices for drugs of abuse and therapeutic drugs applied in the emergency department. *J Emerg Med*. 2012;42(6):682–691.
79. Tomaszewski C, Runge J, Gibbs M, Colucciello S, Price M. Evaluation of a rapid bedside toxicology screen in patients suspected of drug toxicity. *J Emerg Med*. 2005;28(4):389–394.
80. Zhang Y, Kwong TC. Utilization management in toxicology. *Clin Chim Acta*. 2014;427:158–166.
81. Wienczek JR, Colby JM, Nichols JH. Rapid assessment of drugs of abuse. *Adv Clin Chem*. 2017;80:193–225.
82. Wang LL, Ren XX, He Y, Cui GF, Wei ZW, Yun KM. An experimental pharmacokinetics study of diazepam and its metabolites in oral fluid of Chinese population [published online January 21, 2020]. *J Anal Toxicol*. doi:10.1093/jat/bkz101
83. Scherer JN, Fiorentin TR, Borille BT, et al. Reliability of point-of-collection testing devices for drugs of abuse in oral fluid: a systematic review and meta-analysis. *J Pharm Biomed Anal*. 2017;143:77–85.
84. Wagemann L, Maurer HH. Bioanalytical methods for new psychoactive substances. *Handb Exp Pharmacol*. 2018;252:413–439.
85. Nichols JH, Christenson RH, Clarke W, et al. Executive summary: the National Academy of Clinical Biochemistry Laboratory Medicine Practice Guideline: evidence-based practice for point-of-care testing. *Clin Chim Acta*. 2007;379(1–2):14–28; discussion 29–30.
86. Zeserson E, Goodgame B, Hess JD, et al. Correlation of venous blood gas and pulse oximetry with arterial blood gas in the undifferentiated critically ill patient. *J Intensive Care Med*. 2018;33(3):176–181.
87. Schrauben SJ, Negoianu D, Costa C, et al. Accuracy of acid-base diagnoses using the central venous blood gas in the medical intensive care unit. *Nephron*. 2018;139(4):293–298.
88. Ekstrom M, Engblom A, Ilic A, Holthius N, Nordstrom P, Vaara I. Calculated arterial blood gas values from a venous sample and pulse oximetry: clinical validation. *PLoS One*. 2019;14(4):e0215413.
89. Mirzazadeh M, Morovat A, James T, Smith I, Kirby J, Shine B. Point-of-care testing of electrolytes and calcium using blood gas analysers: is it time we trusted the results. *Emerg Med J*. 2016;33(3):181–186.
90. Triplett KE, Wibrow BA, Norman R, et al. Can the blood gas analyser results be believed? A prospective multicentre study comparing haemoglobin, sodium and potassium measurements by blood gas analysers and laboratory auto-analysers. *Anaesth Intensive Care*. 2019;47(2):120–127.
91. Gibbons M, Klim S, Mantzaris A, Dillon O, Kelly AM. How closely do blood gas electrolytes and haemoglobin agree with serum values in adult emergency department patients: an observational study. *Emerg Med Australas*. 2019;31(2):241–246.
92. Kankaanpää M, Holma-Eriksson M, Kapanen S, et al. Comparison of the use of comprehensive point-of-care test panel to conventional laboratory process in emergency department. *BMC Emerg Med*. 2018;18(1):43.
93. Van den Bruel A, Thompson MJ, Haj-Hassan T, et al. Diagnostic value of laboratory tests in identifying serious infections in febrile children: systematic review. *BMJ*. 2011;342:d3082.
94. Chaisson LH, Semitala FC, Asege L, et al. Point-of-care C-reactive protein and risk of early mortality among adults initiating antiretroviral therapy. *AIDS*. 2019;33(5):895–902.
95. Brouwer N, van Pelt J. Validation and evaluation of eight commercially available point of care CRP methods. *Clin Chim Acta*. 2015;439:195–201.
96. Na JY, Park JT. Evaluation of point-of-care testing for C-reactive protein in forensic medicine. *J Korean Med Sci*. 2019;34(38):e246.
97. Thaler M, Luppa PB. Highly sensitive immunodiagnosics at the point of care employing alternative recognition elements and smartphons: hype, trend, or revolution? *Anal Bioanal Chem*. 2019;411(29):7623–7635.
98. Bulterys MA, Wagner B, Redard-Jacot M, et al. Point-of-care urine LAM tests for tuberculosis diagnosis: a status update [published online December 31, 2019]. *J Clin Med*. 2020;9(1):111. doi:10.3390/jcm9010111
99. Kim H, Chung DR, Kang M. A new point-of-care test for the diagnosis of infectious diseases based on multiplex lateral flow immunoassays. *Analyst*. 2019; 144(8):2460–2466.
100. Qin Q, Wang K, Yang J, et al. Algorithms for immunochromatographic assay: review and impact on future application. *Analyst*. 2019;144(19):5659–5676.
101. Egilmezer E, Walker GJ, Bakthavathsalam P, et al. Systematic review of the impact of point-of-care testing for influenza on the outcomes of patients with acute respiratory tract infection. *Rev Med Virol*. 2018;28(5):e1995.
102. Popowitch EB, Miller MB. Performance characteristics of Xpert Flu/RSV XC assay. *J Clin Microbiol*. 2015;53(8):2720–2721.
103. Wahrenbrock MG, Matushek S, Boonlayangoor S, Tesic V, Beavis KG, Charnot-Katsikas A. Comparison of Cepheid Xpert Flu/RSV XC and BioFire FilmArray for detection of influenza A, influenza B, and respiratory syncytial virus. *J Clin Microbiol*. 2016;54(7):1902–1903.
104. Nitsch-Osuch A, Kuchar E, Golebiak I, Kanecki K, Tarka P, Brydak LB. Rapid influenza diagnostic tests improve suitability of antiviral treatment in hospitalized children. *Adv Exp Med Biol*. 2017;968:1–6.
105. Brendish NJ, Malachira AK, Armstrong L, et al. Routine molecular point-of-care testing for respiratory viruses in adults presenting to hospital with acute



respiratory illness (ResPOC): a pragmatic, open-label, randomised controlled trial. *Lancet Respir Med*. 2017;5(5):401–411.

106. Li-Kim-Moy J, Dastouri F, Rashid H, et al. Utility of early influenza diagnosis through point-of-care testing in children presenting to an emergency department. *J Paediatr Child Health*. 2016;52(4):422–429.

107. Brendish NJ, Schiff HF, Clark TW. Point-of-care testing for respiratory viruses in adults: the current landscape and future potential. *J Infect*. 2015;71(5):501–510.

108. Hagen A, Eichinger A, Meyer-Buehn M, Schober T, Huebner J. Comparison of antibiotic and acyclovir usage before and after the implementation of an on-site FilmArray meningitis/encephalitis panel in an academic tertiary pediatric hospital: a retrospective observational study. *BMC Pediatr*. 2020;20(1):56.

109. Brendish NJ, Mills S, Ewings S, Clark TW. Impact of point-of-care testing for respiratory viruses on antibiotic use in adults with exacerbation of airways disease. *J Infect*. 2019;79(4):357–362.

110. Chavez PR, Bradley HM, Wesolowski LG, et al. Performance evaluation of four point-of-care HIV tests using unprocessed specimens. *J Clin Virol*. 2020;124:104282.

111. Pai NP, Tulsy JP, Cohan D, Colford JM Jr, Reingold AL. Rapid point-of-care HIV testing in pregnant women: a systematic review and meta-analysis. *Trop Med Int Health*. 2007;12(2):162–173.

112. Dalcin D, Bogoch II. Point-of-care testing for HIV. *CMAJ*. 2018;190(18):E569.

113. Gliddon HD, Peeling RW, Kamb ML, Toskin I, Wi TE, Taylor MM. A systematic review and meta-analysis of studies evaluating the performance and

operational characteristics of dual point-of-care tests for HIV and syphilis. *Sex Transm Infect*. 2017;93(S4):S3–S15.

114. Negedu-Momoh OR, Jegede FE, Yakubu A, et al. Performance evaluation of BD FACSPresto point of care CD4 analyzer to enumerate CD4 counts for monitoring HIV infected individuals in Nigeria. *PLoS One*. 2017;12(5):e0178037.

115. Moran Z, Sacks JA, Frimpong FK, Frimpong AB, Ben Amor Y. Performance of the BD-FACS Presto for CD4 count and hemoglobin measurement in a district hospital and rural laboratory in Ghana. *PLoS One*. 2019;14(2):e0212684.

116. Bwana P, Vojnov L, Adhiambo M, et al. The BD FACSPresto point of care CD4 test accurately enumerates CD4+ T cell counts. *PLoS One*. 2015;10(12):e0145586.

117. Hong KH, Lee SW, Kim TS, et al. Guidelines for laboratory diagnosis of coronavirus disease 2019 (COVID-19) in Korea. *Ann Lab Med*. 2020;40(5):351–360.

118. Long QX, Liu BZ, Deng HJ, et al. Antibody responses to SARS-CoV-2 in patients with COVID-19. *Nat Med*. 2020;26(6):845–848. doi:10.1038/s41591-020-0897-1

119. Imai K, Tabata S, Ikeda M, et al. Clinical evaluation of an immunochromatographic IgM/IgG antibody assay and chest computed tomography for the diagnosis of COVID-19. *J Clin Virol*. 2020;128:104393.

120. Brendish NJ, Malachira AK, Clark TW. Molecular point-of-care testing for respiratory viruses versus routine clinical care in adults with acute respiratory illness presenting to secondary care: a pragmatic randomised controlled trial protocol (ResPOC). *BMC Infect Dis*. 2017;17(1):128.
